# Supplementary figures and images for: Nutrients Uptake and Accumulation in Plant Parts of Fragrant Rosa Species Irrigated with Treated and Untreated Wastewater
Source: MDPI journal article supplement (doi:10.3390/plants11091260), 2022-05-06

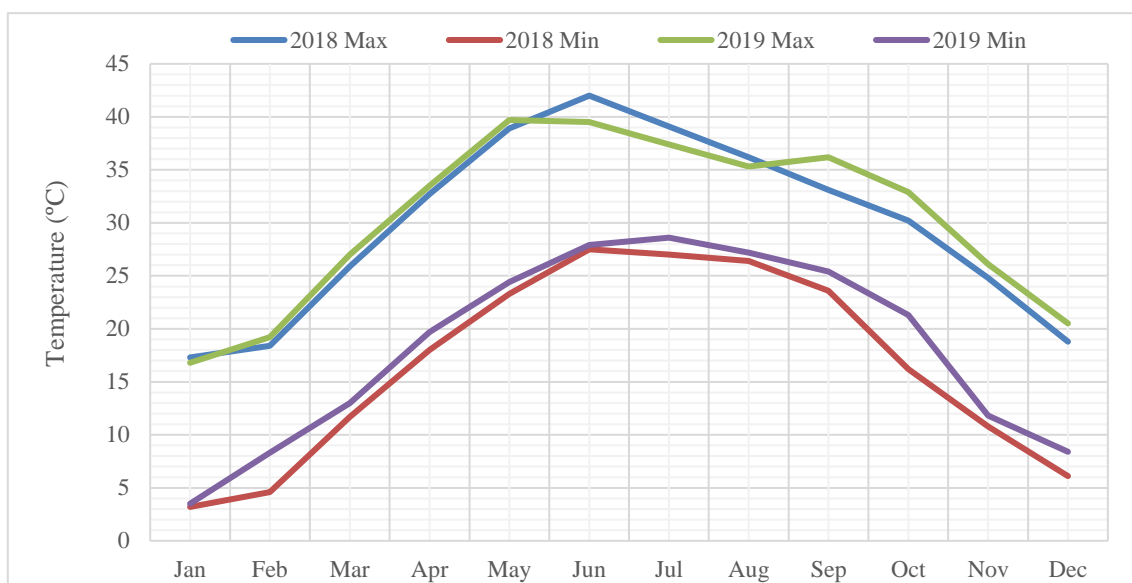

**Figure S1.** Mean monthly minimum and maximum temperature (°C) during the experimental period.

Supplement: s1 [file s1]
